# Supplementary material for: Function and Regulation of Chloroplast Peroxiredoxin IIE
Source: MDPI journal article supplement (doi:10.3390/antiox10020152), 2021-01-21
Supplement: s1 [file s1]

**Table S1.** Primers used in this study for cloning.

| Gene           | AGI       | Restriction enzyme |         | Primer Sequence 5'→3'               |
|----------------|-----------|--------------------|---------|-------------------------------------|
| GRX-S12        | AT2G20270 | NdeI               | Forward | TTTCCAACATATGGGATCGACATTGGAGGAGACTG |
|                |           | BamHI              | Reverse | TTTCAGGATCCCTAGGTCTGACCGTTTTTCC     |
| SRX            | AT1G31170 | NdeI               | Forward | ACATATGAACGGTTCGCCGCCGGTGAT         |
|                |           | BamHI              | Reverse | AAAGGATCCTCAGCGAAGATGATGCCTTA       |
| PRX-IIIE       | AT3G52960 | NdeI               | Forward | ATATACATATGGCCTCCATTTCCGTCGG        |
|                |           | BamHI              | Reverse | ATATAGGATCCTCAGAGAGCTTTAAGCATATC    |
| PRX-IIIE C121S | AT3G52960 |                    | Forward | GGCGCATTACACCAACAAGCTCAC            |
|                |           |                    | Reverse | GTGAGCTTGTTGGTGTGAATG               |
| PRX-IIIE C146S | AT3G52960 |                    | Forward | AATCGCAAGTATCTCCGTCAAC              |
|                |           |                    | Reverse | GACGGAGATACTTGCGATTACAT             |
| PRX-IIIE S82D  | AT3G52960 |                    | Forward | GGTAGGAGAGAGTGTCGTCTGGGAGCTTGT      |
|                |           |                    | Reverse | ACAAGCTCCCAGACGACACTCTCTCCTACC      |
| PRX-IIIE T108E | AT3G52960 |                    | Forward | GAACGGCGAATAGGATTCTTTCTTCCCGGCG     |
|                |           |                    | Reverse | CGCCGGGAAGAAAGAAATCCTATTGCGCGTTC    |
| PRX-IIIE T223E | AT3G52960 |                    | Forward | CTCAGCACTACTATTTTCAAAAGCACCTCCTTC   |
|                |           |                    | Reverse | GAAGGAGGTGCTTTTGAAAATAGTAGTGCTGAG   |
| PRX-IIIE-EYFP  | AT3G52960 | BamHI              | Forward | ATATAGGATCCATGGCGACTTCTCTCTCCGTTTC  |
|                |           | AgeI               | Reverse | AAACCGGTGGGAGAGCTTTAAGCATATCCTCAG   |

**Table S2.** GSNO-dependent posttranslational modification of PRX-IIIE. 10  $\mu$ M pre-reduced PRX-IIIE protein was incubated with indicated concentrations of GSNO for 16 min at RT and analyzed by ESI-MS. Data are means of  $n=10 \pm$  SD with the protein of two independent protein purifications.

| Treatment/Cys modification | Mass [Da]            | Mass difference to reduced protein [Da] |
|----------------------------|----------------------|-----------------------------------------|
| <b>5 mM DTT (control)</b>  |                      |                                         |
| -SH                        | 19,438.50 $\pm$ 0.38 | /                                       |
| <b>1 mM GSNO</b>           |                      |                                         |
| -SNO                       | 19,469.46 $\pm$ 0.32 | 31                                      |
| -SNO (2x)                  | 19,496.40 $\pm$ 0.98 | 58                                      |
| -SSG                       | 19,744.42 $\pm$ 0.58 | 306                                     |
| -SSGNO                     | 19,772.86 $\pm$ 1.03 | 334                                     |
| <b>5 mM GSNO</b>           |                      |                                         |
| -SNO                       | 19,469.37 $\pm$ 0.34 | 31                                      |
| -SNO (2x)                  | 19,496.77 $\pm$ 0.54 | 58                                      |
| -SSG                       | 19,744.01 $\pm$ 1.05 | 306                                     |
| -SSGNO                     | 19,722.80 $\pm$ 1.09 | 334                                     |

**Table S3.** Identified 14-3-3 proteins and their unique peptides.

| Protein           | AGI       | Identified unique peptides | All identified peptides | Unique peptide sequences                                                                                                                                                                                                                                                                                          | Localization                                   | Reference  |
|-------------------|-----------|----------------------------|-------------------------|-------------------------------------------------------------------------------------------------------------------------------------------------------------------------------------------------------------------------------------------------------------------------------------------------------------------|------------------------------------------------|------------|
| 14-3-3 $\chi$     | AT4G09000 | 11                         | 25                      | DEFVYMAKLAEQAER<br>DEFVYMAKLAEQAERYEEMVEFMEK<br>DNLTWLWTSMDQDDVADDIK<br>DSTLIMQLLRDNLTWLWTSMDQDDVADDIK<br>DSTLIMQLLRDNLTWLWTSMDQDDVADDIKEAA<br>PAAAKPADEQQS<br>EESRGNDHDVSLIRDYR<br>GNDDHVSILIR<br>GNDDHVSILIRDYR<br>IETELSDICDGILK<br>KDAAEHTLTAYK<br>MATPGASSARDEFVYMAKLAEQAER                                  | Cytosol, nucleus, chloroplast, Golgi, vacuole  | [40-44]    |
| 14-3-3 $\omega$   | AT1G78300 | 0                          | 8                       |                                                                                                                                                                                                                                                                                                                   | Cytosol, nucleus                               | [45]       |
| 14-3-3 $\varphi$  | AT1G78300 | 4                          | 14                      | DNLTWLWTSMDQDESPEEIK<br>EEVYVLAKLAEQAERYEEMVEFMEK<br>GNDDHVTIR<br>LAEQAERYEEMVEFMEKVAEAVDK<br>ASWRIISSIEQKEDSR<br>DNLTWLWTSDLNDEAGDDIKEAPK<br>DSTLIMQLLRDNLTWLWTSDLNDEAGDDIK<br>EDSRGNSDHVSIK<br>ICDGILNLEAHLIPAASLAESK<br>LGLALNFSVFYIEILNSSDR<br>SAQDIALADLAPTHPIRLGLALNFSVFYIEILNS<br>SDRACSLAK<br>VDEQAQPPPSQ | Cytosol, nucleus, plasma membrane              | [41,46,47] |
| 14-3-3 $\upsilon$ | AT5G16050 | 8                          | 17                      | DQYVYMAKLAEQAERYEEMVQFMEQLVTGAT<br>PAEELTVEER<br>QAFEEAIAELDTLGEESYK<br>QAFEEAIAELDTLGEESYKDSSTLIMQLLR<br>YEEMVQFMEQLVTGATPAEELTVEER<br>YMAEFK                                                                                                                                                                    | Chloroplast, cytosol                           | [48]       |
| 14-3-3 $\lambda$  | AT5G10450 | 5                          | 7                       |                                                                                                                                                                                                                                                                                                                   | Nucleus, cytosol, plasma membrane, chloroplast | [49-51]    |
| 14-3-3 $\nu$      | AT3G02520 | 2                          | 12                      | MSSSREENVYLAK<br>TVDDELTVVEERNLLSVAYK                                                                                                                                                                                                                                                                             | Chloroplast, Cytosol                           | [48]       |

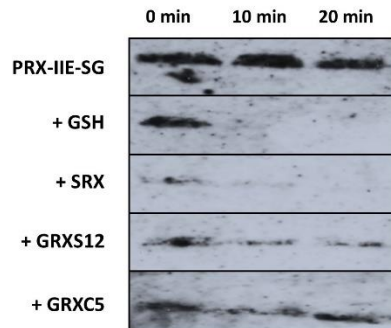**Figure S1.** Deglutathionylation of PRX-IIIE catalyzed by GSH, SRX, GRX-S12, or GRX-C5. The time course of the deglutathionylation reaction was analyzed by immunodetection with the anti-glutathione antibody. The signal intensity decreased in the presence of GSH and SRX and to a minor extent with GRXS12 as well as with GRXC5, indicating that GSH alone modulates the deglutathionylation of PRX-IIIE efficiently.
